# Supplementary material for: Development of the Digital Assessment of Precise Physical Activity (DAPPA) Tool for Older Adults
Source: MDPI journal article supplement (doi:10.3390/ijerph17217949), 2020-10-29
Supplement: s1 [file s1]

**Table S1.** Activities available to select in DAPPA Tool.

| Activity                                                  | METs | Ainsworth (2011) Compendium of Physical Activity Code |
|-----------------------------------------------------------|------|-------------------------------------------------------|
| <b>Home and Garden</b>                                    |      |                                                       |
| Light Gardening (e.g., light weeding, trimming shrubs)    | 3.5  | 08239                                                 |
| Heavy Gardening (e.g., heavy weeding, shovelling)         | 5.0  | 08241                                                 |
| Ironing                                                   | 1.8  | 05070                                                 |
| Lawn mowing                                               | 4.5  | 08125                                                 |
| Cooking                                                   | 2    | 05050                                                 |
| Light Housework (e.g., sweeping, vacuuming)               | 2.8  | 05025                                                 |
| Heavy Housework (e.g., washing windows, cleaning gutters) | 3.3  | 05030                                                 |
| Laundry                                                   | 2    | 05090                                                 |
| Caring for a disabled partner/family member               | 4    | 05200                                                 |
| Working on car                                            | 3.3  | 06030                                                 |
| Home repair (e.g., DIY, decorating)                       | 4.5  | 06127                                                 |
| Walking the dog                                           | 3    | 17165                                                 |
| <b>Out and About</b>                                      |      |                                                       |
| Leisurely Walking (e.g., around town, to the doctors)     | 3.5  | 17160                                                 |
| Brisk Walking (e.g., to the shops, around town)           | 4.3  | 17200                                                 |
| Leisurely Cycling                                         | 3.5  | 01018                                                 |
| Cycling                                                   | 7.5  | 01015                                                 |
| Walking the dog                                           | 3    | 17165                                                 |
| Shopping                                                  | 3.3  | 05060                                                 |
| Carrying shopping                                         | 2.5  | 05055                                                 |
| Volunteering                                              | 3    | 21070                                                 |
| Driving                                                   | 2.5  | 16010                                                 |
| Travelling on public transport (e.g., train or bus)       | 1.3  | 16016                                                 |
| Labouring                                                 | 4.0  | 11120                                                 |
| Custodial work                                            | 2.3  | 11125                                                 |
| Office work                                               | 1.5  | 11580                                                 |
| Retail work                                               | 3    | 11600                                                 |
| <b>Sports and Exercise</b>                                |      |                                                       |
| Leisurely Walking                                         | 3.5  | 17160                                                 |
| Brisk Walking                                             | 4.3  | 17200                                                 |
| Hiking                                                    | 6    | 17080                                                 |
| Cycling (Leisurely)                                       | 3.5  | 01018                                                 |
| Cycling                                                   | 7.5  | 01015                                                 |
| Archery                                                   | 4.3  | 15010                                                 |
| Badminton                                                 | 5.5  | 15030                                                 |
| Basketball                                                | 6.5  | 15055                                                 |
| Snooker/Pool                                              | 2.5  | 15080                                                 |
| Bowling                                                   | 3    | 15090                                                 |
| Canoeing/Kayaking                                         | 3.5  | 18070                                                 |
| Cricket                                                   | 4.8  | 15150                                                 |
| Croquet                                                   | 3.3  | 15160                                                 |
| Exercise Bike (Stationary)                                | 7.0  | 02010                                                 |
| Exercise class                                            | 5    | 02061                                                 |
| Football                                                  | 8    | 15230                                                 |
| Golf (Walking)                                            | 4.3  | 15255                                                 |
| Golf (Using a cart)                                       | 3.5  | 15290                                                 |
| Hockey                                                    | 7.8  | 15350                                                 |

|                                                              |      |       |
|--------------------------------------------------------------|------|-------|
| Horse riding                                                 | 5.5  | 15370 |
| Jogging                                                      | 7    | 12020 |
| Light calisthenics (e.g., situps, abdominal<br>crunches)     | 2.8  | 02024 |
| Moderate calisthenics (e.g., push-ups, sit ups,<br>pull-ups) | 3.8  | 02022 |
| Martial Arts (gentle practice)                               | 5.3  | 15425 |
| Martial Arts (vigorous practice/sparring)                    | 10.3 | 15430 |
| Mountain Biking                                              | 14.0 | 01003 |
| Pilates                                                      | 3.0  | 02105 |
| Resistance (weight) training                                 | 3.5  | 02054 |
| Rowing Machine                                               | 7.0  | 02072 |
| Running                                                      | 8    | 12150 |
| Rugby                                                        | 6.3  | 15562 |
| Sailing                                                      | 3.0  | 18120 |
| Skating (Ice/Roller)                                         | 7.0  | 15590 |
| Squash                                                       | 12.0 | 15650 |
| Swimming                                                     | 5.3  | 18265 |
| Table tennis                                                 | 6.0  | 15500 |
| Tai Chi                                                      | 3    | 15670 |
| Tennis (Singles)                                             | 7.3  | 15675 |
| Tennis (Doubles)                                             | 4.5  | 15686 |
| Water aerobics                                               | 5.5  | 18355 |
| Yoga                                                         | 2.5  | 02150 |
| Zumba                                                        | 6.5  | TBD * |
| <b>Social and Leisure</b>                                    |      |       |
| Active video game (e.g., Wii Fit)                            | 3.8  | 02003 |
| Arts and Crafts                                              | 1.8  | 09075 |
| Bowls                                                        | 3.3  | 15465 |
| Attending church                                             | 1.3  | 20000 |
| Board Games                                                  | 1.5  | 09000 |
| Dancing                                                      | 7.8  | 03031 |
| Darts                                                        | 2.5  | 15180 |
| Fishing                                                      | 3.5  | 04001 |
| Meeting Friends                                              | 1.5  | 21000 |
| Playing an Instrument                                        | 2    | 10074 |
| Playing Cards                                                | 1.5  | 09010 |
| Seeing Children/Grandchildren                                | 3    | 09101 |
| Sewing (machine)                                             | 2.8  | 05082 |
| Sexual Activity                                              | 1.8  | 14020 |
| Exercise class                                               | 5    | 02061 |

\* This is as specified by the compendium—MET value is provided, but code yet to be assigned. MET, metabolic equivalent of task; DIY, do it yourself.
